# Supplementary material
Source: PubMed Central journal article supplement (PMC7992064)
Supplement: ao0c05635_si_001.pdf [file ao0c05635_si_001.pdf]

# Quick and Easy Assembly of a One-step qRT-PCR Kit for COVID-19 Diagnostics Using In-House Enzymes

Masateru Takahashi<sup>1,†,\*</sup>, Muhammad Tehseen<sup>1,†</sup>, Rahul Salunke<sup>2</sup>, Etsuko Takahashi<sup>1</sup>, Sara Mfarrej<sup>2</sup>, Mohamed A. Sobhy<sup>1</sup>, Fatimah S. Alhamlan<sup>3</sup>, Sharif Hala<sup>2,4,5</sup>, Gerardo Ramos-Mandujano<sup>6</sup>, Ahmed A. Al-Qahtani<sup>3</sup>, Fadwa S. Alofi<sup>7</sup>, Afrah Alsomali<sup>8</sup>, Anwar M. Hashem<sup>9</sup>, Asim Khogeer<sup>10</sup>, Naif A. M. Almontashiri<sup>11</sup>, Jae Man Lee<sup>12</sup>, Hiroaki Mon<sup>12</sup>, Kosuke Sakashita<sup>13</sup>, Mo Li<sup>6</sup>, Takahiro Kusakabe<sup>12</sup>, Arnab Pain<sup>2</sup>, and Samir M. Hamdan<sup>1,\*</sup>

<sup>1</sup> Laboratory of DNA Replication and Recombination, Biological and Environmental Sciences and Engineering Division, King Abdullah University of Science and Technology (KAUST), Thuwal 23955-6900, Saudi Arabia.

<sup>2</sup> Pathogen Genomics Laboratory, BESE Division, King Abdullah University of Science and Technology (KAUST), Thuwal 23955-6900, Saudi Arabia.

<sup>3</sup> Department of Infection and Immunity, King Faisal Specialist Hospital and Research Center, Riyadh, 11211, Saudi Arabia.

<sup>4</sup> King Saud bin Abdulaziz University of Health Sciences, Jeddah, 22384, Saudi Arabia.

<sup>5</sup> King Abdullah International Medical Research Centre, Jeddah, Makkah, Ministry of National Guard Health Affairs, Jeddah, Makkah, 22384, Saudi Arabia.

<sup>6</sup> Stem Cell and Regeneration Laboratory. Biological and Environmental Sciences and Engineering Division, King Abdullah University of Science and Technology (KAUST), Thuwal 23955-6900, Saudi Arabia.

<sup>7</sup> Infectious Diseases Department, King Fahad Hospital, Madinah, 3177, Saudi Arabia.

<sup>8</sup> King Abdullah Medical Complex (KAMC), Jeddah, 23816, Saudi Arabia.

<sup>9</sup> Vaccines and Immunotherapy Unit, King Fahd Medical Research Center; King Abdulaziz University, Jeddah, Saudi Arabia; Department of Medical Microbiology and Parasitology, Faculty of Medicine, King Abdulaziz University, Jeddah, 21589, Saudi Arabia.

<sup>10</sup> Plan and Research Department, General Directorate of Health Affairs Makkah Region, MOH, 24321, Saudi Arabia.

<sup>11</sup> College of Applied Medical Sciences, Taibah University, Madinah, 41311, Saudi Arabia; Center for Genetics and Inherited Diseases, Taibah University, Madinah, 42353, Saudi Arabia.

<sup>12</sup> Laboratory of Insect Genome Science, Kyushu University Graduate School of Bioresource and Bioenvironmental Sciences, Motooka 744, Nishi-ku, Fukuoka 819-0395, Japan.

<sup>13</sup> King Abdullah University of Science and Technology (KAUST), Department of Infection and Immunity, King Faisal Specialist Hospital and Research Centre, Thuwal, 23955-6900, Saudi Arabia.

\* **Correspondence:** Samir M. Hamdan (samir.hamdan@kaust.edu.sa)  
Masateru Takahashi (masateru.takahashi@kaust.edu.sa)

† These authors contributed equally: Muhammad Tehseen, Masateru Takahashi

**Figure S1**

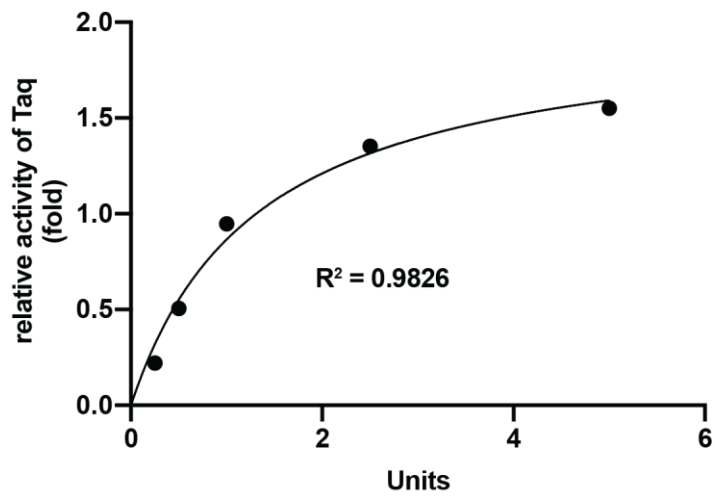

**Standard titration curve of native Taq Pol's activity.**

The PCR assays were conducted with serially diluted N-Taq Pol (Thermofisher) (see Materials and Methods section), and the standard titration curve of N-Taq Pol activity was plotted.

**Figure S2**

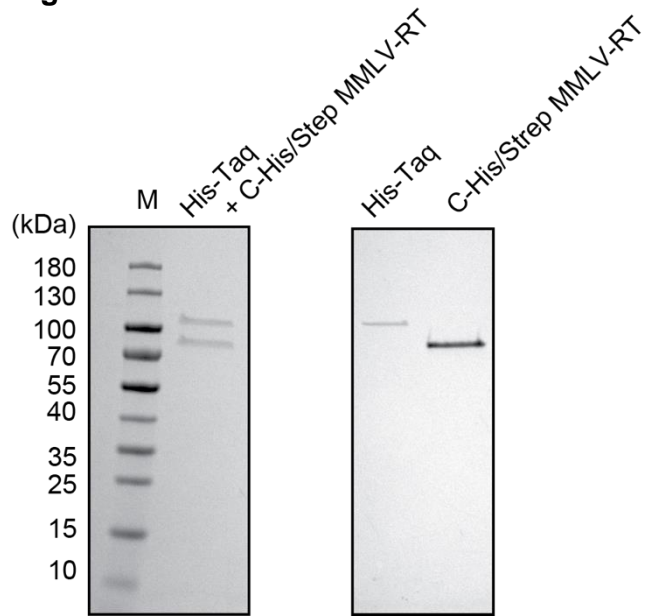

**SDS-PAGE analysis of His-Taq and C-His/Strep MMLV-RT after the PCR.**

After the PCR products were analyzed in Figure 3C, the reaction mixture leftover (500 ng of C-His/Strep MMLV-RT vs. 20 units of His-Taq Pol) was subjected to the SDS-PAGE analysis (left panel). Fresh purified His-Taq Pol and C-His/Strep MMLV-RT were loaded as a size control (right panel).

**Figure S3**

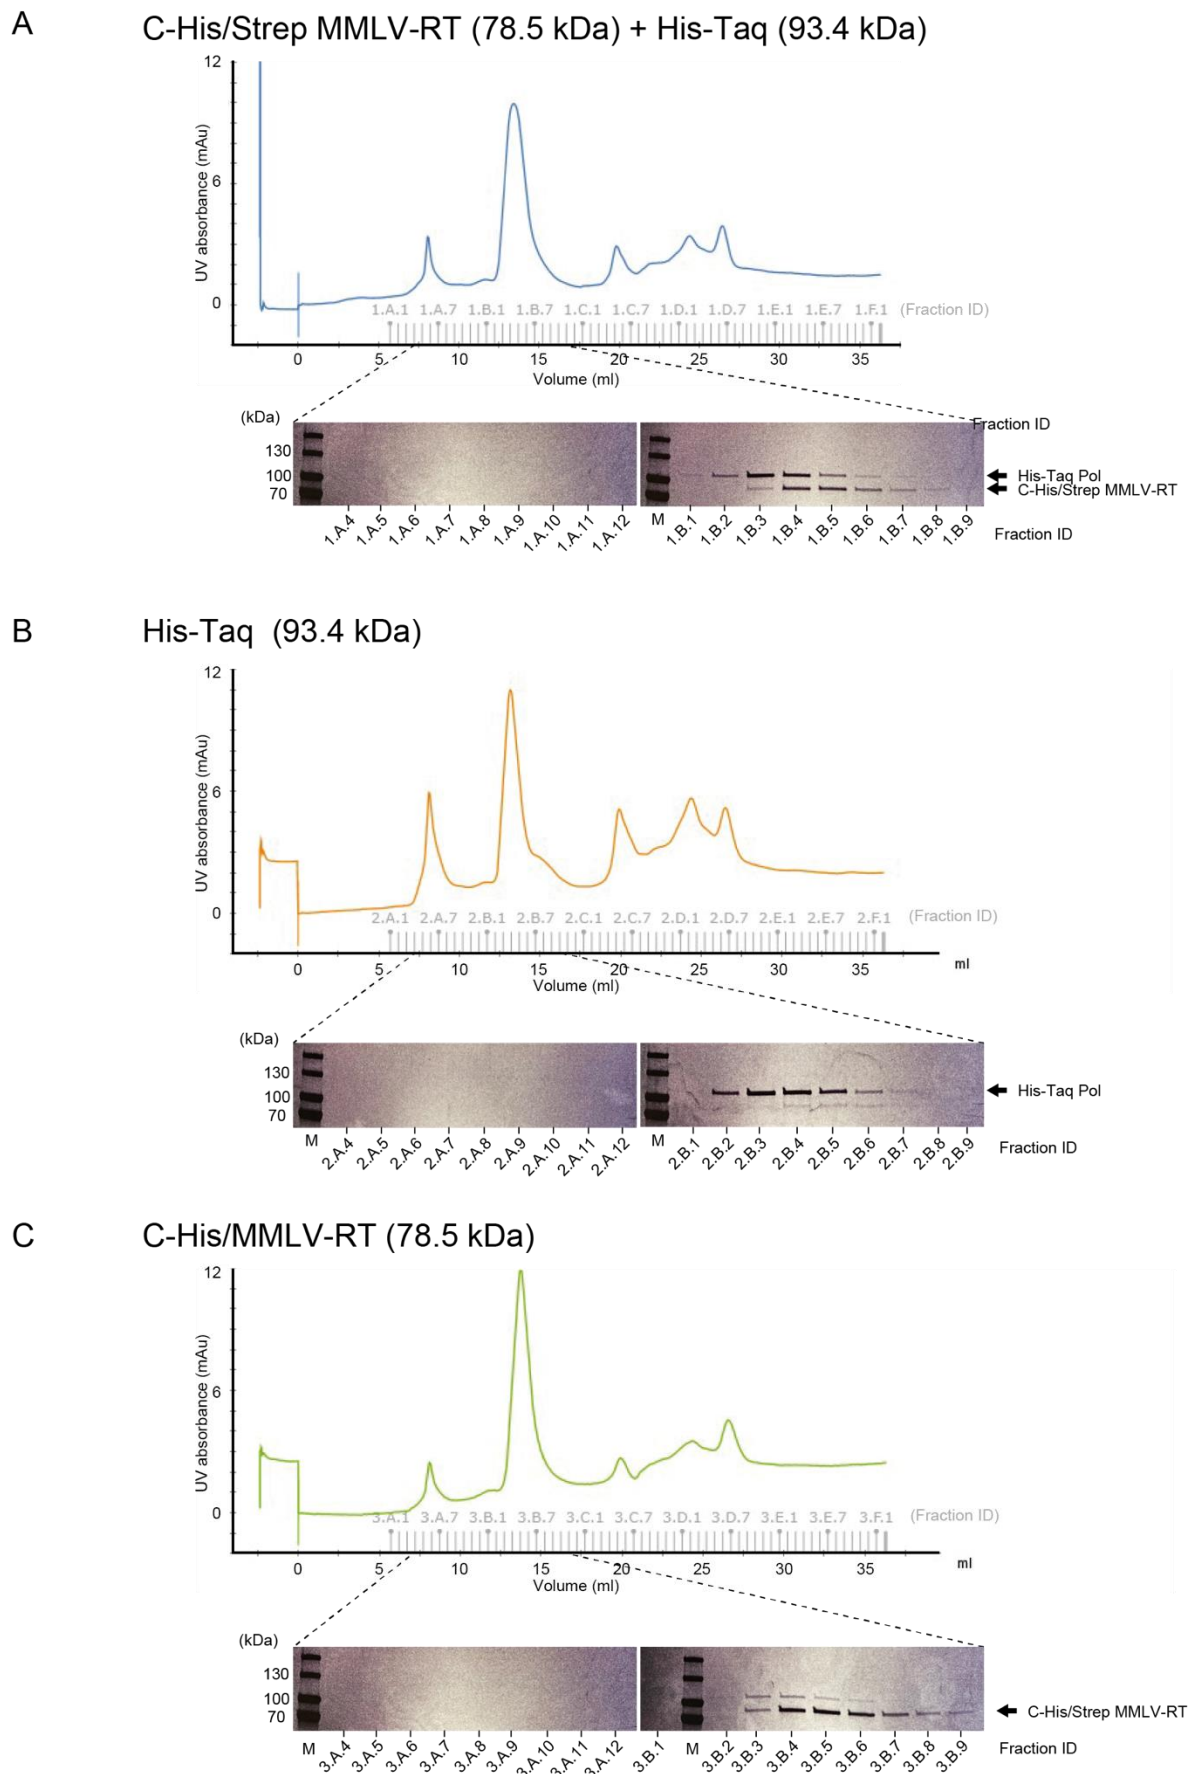

**Elution profiles and SDS-PAGE gels of C-His/Strep MMLV-RT and His-Taq Pol from SEC.**

The elution profiles from size-exclusion chromatography (SEC) and SDS-PAGE gels are shown for the mixture of C-His/Strep MMLV-RT and His-Taq (A), His-Taq only (B), and C-His/Strep MMLV-RT only (C). The protein samples were mixed with the PCR buffer and incubated on ice for 10 minutes. And the incubated samples were loaded onto the Superdex 200 10/30 GL column (GE Healthcare).

**Figure S4**

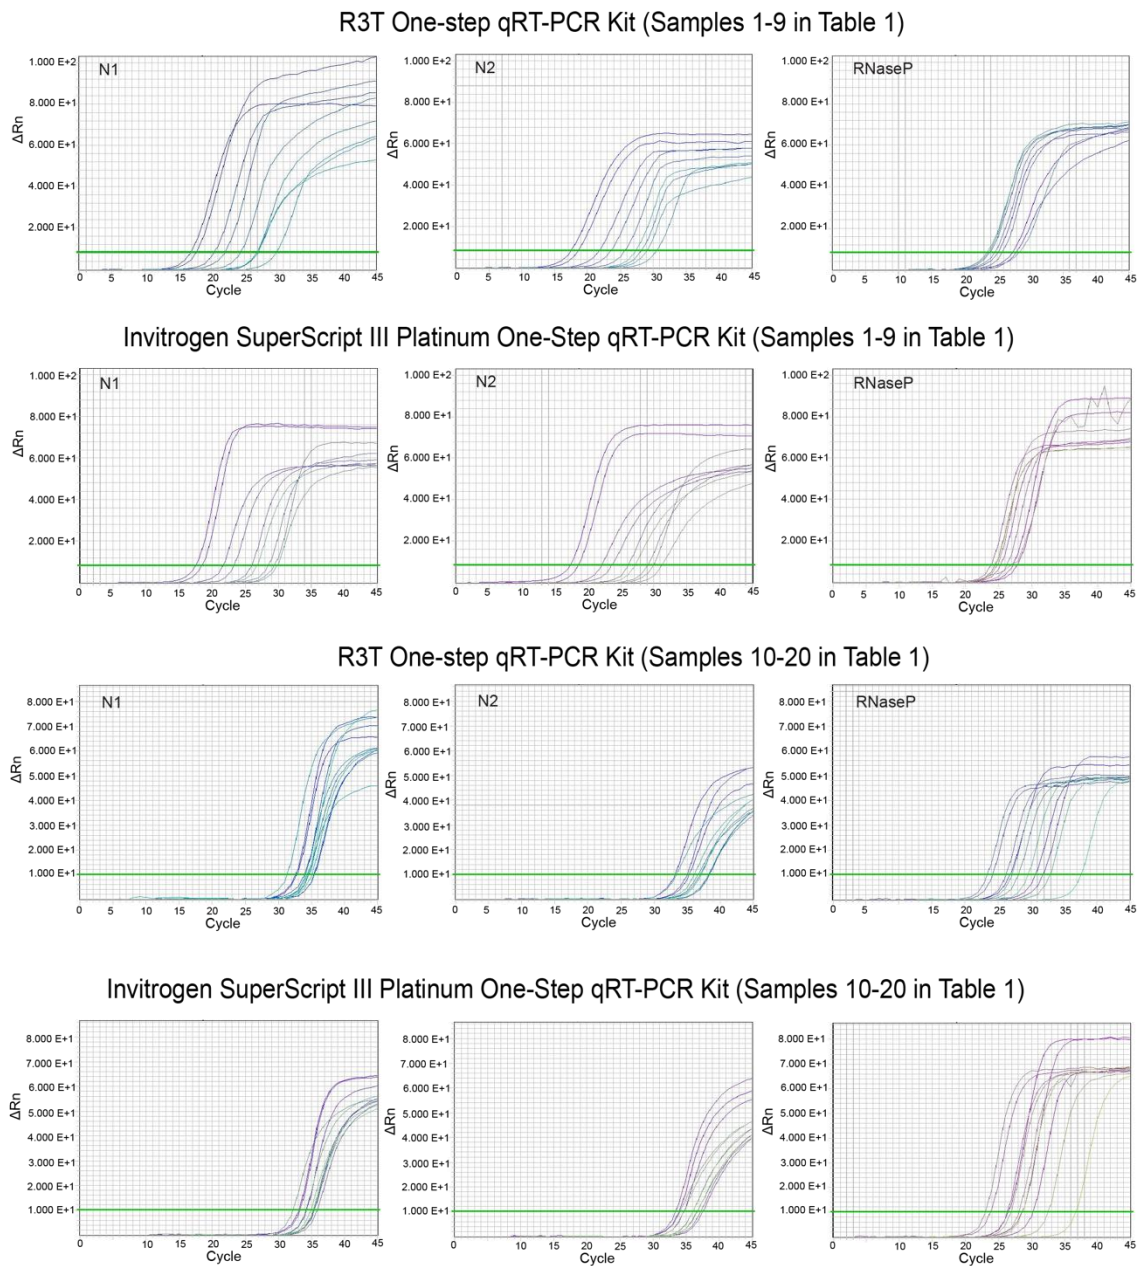

**Comparison of amplification curves from the different positive patient samples.**

The amplification curves of Ct values in Table 1 are shown. N1, N2, and RNaseP represent the primer sets used with the R3T One-step qRT-PCR kit or the Invitrogen SuperScript III Platinum One-Step qRT-PCR kit.

**Table S1**

Comparison of R3T One-step qRT-PCR System with TaqPath 1-Step RT-qPCR System.

| R3T One-step qRT-PCR System |        |                                |      |      |          |                     | Thermofisher TaqPath 1-Step RT-qPCR System |        |                                |      |         |      |          |                     |
|-----------------------------|--------|--------------------------------|------|------|----------|---------------------|--------------------------------------------|--------|--------------------------------|------|---------|------|----------|---------------------|
| Sr. No.                     | Sample | Ct value<br>in patient samples |      |      | Expected | Result              | Sr. No.                                    | Sample | Ct value<br>in patient samples |      |         |      | Expected | Result              |
|                             |        | N1                             | N2   | RP   |          |                     |                                            |        | N                              | S    | ORF 1ab | MS2  |          |                     |
| 1                           | RC-26  | 19.4                           | 15.9 | 27.7 | +        | Positive SARS CoV-2 | 1                                          | RC-26  | 18.8                           | 19.8 | 20.1    | 30.3 | +        | Positive SARS CoV-2 |
| 2                           | RC-3   | 13.3                           | 17.1 | 28.5 | +        | Positive SARS CoV-2 | 2                                          | RC-3   | 16.9                           | 17.7 | 17.2    | 37.1 | +        | Positive SARS CoV-2 |
| 3                           | RC-7   | 18                             | 18.7 | 26.6 | +        | Positive SARS CoV-2 | 3                                          | RC-7   | 16.4                           | 16   | 15.7    | 32.8 | +        | Positive SARS CoV-2 |
| 4                           | RC-4   | 24.6                           | 25.4 | 29.8 | +        | Positive SARS CoV-2 | 4                                          | RC-4   | 25                             | 25.4 | 24.8    | 26.5 | +        | Positive SARS CoV-2 |
| 5                           | RC-5   | 12.3                           | 18.9 | 29.9 | +        | Positive SARS CoV-2 | 5                                          | RC-5   | 17.5                           | 18.6 | 18      | 36.6 | +        | Positive SARS CoV-2 |
| 6                           | RC-13  | 17.7                           | 18.5 | 24.8 | +        | Positive SARS CoV-2 | 6                                          | RC-13  | 16.8                           | 16.1 | 16.1    | 37   | +        | Positive SARS CoV-2 |
| 7                           | RC-30  | 26.5                           | 24.1 | 28.2 | +        | Positive SARS CoV-2 | 7                                          | RC-30  | 27.1                           | 26.8 | 27.4    | 28.6 | +        | Positive SARS CoV-2 |
| 8                           | RC-31  | 16.6                           | 14.3 | 26.6 | +        | Positive SARS CoV-2 | 8                                          | RC-31  | 15.9                           | 16   | 16.3    | 34.6 | +        | Positive SARS CoV-2 |
| 9                           | RC-38  | 33                             | 28.9 | 24.9 | +        | Positive SARS CoV-2 | 9                                          | RC-38  | 31.9                           | 30.2 | 30.9    | 26.5 | +        | Positive SARS CoV-2 |
| 10                          | RC-39  | 25.2                           | 21.9 | 22.6 | +        | Positive SARS CoV-2 | 10                                         | RC-39  | 24.6                           | 23.9 | 24.2    | 26.7 | +        | Positive SARS CoV-2 |
| 11                          | RC-40  | 16.6                           | 14.1 | 22.9 | +        | Positive SARS CoV-2 | 11                                         | RC-40  | 16.6                           | 15.1 | 15.3    | 36.3 | +        | Positive SARS CoV-2 |
| 12                          | RC-44  | 24.9                           | 22.4 | 25.8 | +        | Positive SARS CoV-2 | 12                                         | RC-44  | 24                             | 22.4 | 22.6    | 29   | +        | Positive SARS CoV-2 |
| 13                          | RC-45  | 24.5                           | 22.8 | 24.5 | +        | Positive SARS CoV-2 | 13                                         | RC-45  | 23.4                           | 21.7 | 21.3    | 29.9 | +        | Positive SARS CoV-2 |
| 14                          | RC-46  | 19.7                           | 18.9 | 27.9 | +        | Positive SARS CoV-2 | 14                                         | RC-46  | 18.7                           | 17.2 | 17.3    | 33   | +        | Positive SARS CoV-2 |
| 15                          | RC-47  | 22                             | 21.2 | 26   | +        | Positive SARS CoV-2 | 15                                         | RC-47  | 21                             | 19.7 | 20.1    | 30   | +        | Positive SARS CoV-2 |
| 16                          | RC-9   | 28.6                           | 29.5 | 26.7 | +        | Positive SARS CoV-2 | 16                                         | RC-9   | 27.5                           | 25.5 | 24.7    | 27   | +        | Positive SARS CoV-2 |
| 17                          | RC-10  | 27.4                           | 28.2 | 32.1 | +        | Positive SARS CoV-2 | 17                                         | RC-10  | 21.5                           | 24.4 | 24      | 24.1 | +        | Positive SARS CoV-2 |
| 18                          | RC-11  | 35.6                           | 34.7 | 29.2 | +        | Positive SARS CoV-2 | 18                                         | RC-11  | 32.9                           | 33.8 | 34.9    | 23.5 | +        | Positive SARS CoV-2 |
| 19                          | RC-12  | 33.7                           | 32.2 | 24.6 | +        | Positive SARS CoV-2 | 19                                         | RC-12  | 31.3                           | 31.8 | 31.5    | 27   | +        | Positive SARS CoV-2 |
| 20                          | RC-6   | 33.5                           | 34   | 29.8 | +        | Positive SARS CoV-2 | 20                                         | RC-6   | 32.6                           | 34.6 | 34.9    | 27   | +        | Positive SARS CoV-2 |
| 21                          | RC-36  | -                              | -    | 27.7 | -        | Negative SARS CoV-2 | 21                                         | RC-36  | -                              | -    | -       | 27.9 | -        | Negative SARS CoV-2 |
| 22                          | RC-37  | -                              | -    | 28.3 | -        | Negative SARS CoV-2 | 22                                         | RC-37  | -                              | -    | -       | 27.7 | -        | Negative SARS CoV-2 |
| 23                          | RC-49  | -                              | -    | 26.4 | -        | Negative SARS CoV-2 | 23                                         | RC-49  | -                              | -    | -       | 26.6 | -        | Negative SARS CoV-2 |
| 24                          | RC-64  | -                              | -    | 25.5 | -        | Negative SARS CoV-2 | 24                                         | RC-64  | -                              | -    | -       | 26.8 | -        | Negative SARS CoV-2 |
| 25                          | RC-65  | -                              | -    | 27.1 | -        | Negative SARS CoV-2 | 25                                         | RC-65  | -                              | -    | -       | 26.5 | -        | Negative SARS CoV-2 |

N1 and N2: N-gene; RP: RNaseP; NTC: No template

N: N-gene; S: Spike Protein gene; MS2: Phage Control
